# Supplementary material for: Fluorescent nanoparticles from mature vinegar: their properties and interaction with dopamine
Source: Royal Society of Chemistry journal article supplement (doi:10.1039/c7fo01475a), 2017-01-01
Supplement: c7fo01475a1.pdf [file c7fo01475a1.pdf]

1  
2  
3  
4  
5  
6  
7  
8  
9  
10  
11  
12  
13  
14  
15  
16  
17  
18  
19  
20  
21  
22

## Supporting Information

### **Fluorescent Nanoparticles from Mature Vinegar: Their Properties and Interaction with Dopamine**

Lin Cao,<sup>ab</sup> Xunyu Song,<sup>ab</sup> Yukun Song,<sup>ab</sup> Jingran Bi,<sup>ab</sup> Shuang Cong,<sup>ab</sup>  
Chenxu Yu<sup>bc</sup> and Mingqian Tan<sup>ab\*</sup>

*<sup>a</sup>School of Food Science and Technology, National Engineering Research Center of  
Seafood, Dalian Polytechnic University, Qinggongyuan I, Ganjingzi District, Dalian  
116034, Liaoning, People's Republic of China*

*<sup>b</sup>Engineering Research Center of Seafood of Ministry of Education of China, Dalian  
116034, Liaoning, People's Republic of China*

*<sup>c</sup>Department of Agricultural and Biosystems Engineering, Iowa State University,  
Ames, IA 50011, USA*

\*Corresponding author (Tel& Fax: +86-411-86318657, E-mail: M. Tan,  
[2468750030@qq.com](mailto:2468750030@qq.com), ORCID: 0000000275350035).

23 **Contents**

24 **Experimental section**

25 **Stability study of the FNs**

26 **Results**

27 **Figure S1** (a) The fluorescence responses of FNs towards different pH. (b) The  
28 fluorescence responses of FNs towards different NaCl concentration. (c) The  
29 fluorescence responses of FNs towards different irradiation time. (d) The fluorescence  
30 responses of FNs towards different metal ions.

31 **Figure S2** Fluorescence intensity of FNs ( $3.75 \text{ mg mL}^{-1}$ ) with the addition of different  
32 concentration of dopamine.  $\lambda_{\text{ex}}=330 \text{ nm}$ ,  $\lambda_{\text{em}}=407 \text{ nm}$ .

33 **Figure S3** Corresponding particle size histogram of (a) PDA- FCs, (b) FNs-FCs-0.5,  
34 (c) FNs-FCs-1, (d) FNs-FCs-2 and (e) FNs-FCs-4, respectively.

35 **Figure S4** FT-IR spectra of (A) FNs-FCs-0.5, (B) FNs-FCs-1 and (C) FNs-FCs-2,  
36 respectively.

37 **Figure S5** Fluorescence emission spectra of FNs ( $\text{Ex}=320\text{nm}$ ) and the excitation  
38 spectra of PDA-FCs ( $\text{Em}=400\text{nm}$ ).

39 **Table S1** Quantum yield results of FNs, PDA-FCs and FNs-FCs samples.

40 **Table S2** XPS elemental analysis results of FNs, PDA-FCs and FNs-FCs-4 samples.

41 **Table S3** Fluorescence lifetime fitting parameters of FNs, FNs-FCs and PDA-FCs  
42 samples.

43

44

45 **Experimental section**

46 **Stability study of the FNs**

47 **Effect of pH on fluorescence intensity of the FNs.** Different amounts of 0.2 mol L<sup>-1</sup>  
48 NaOH solution were added to the Britton–Robinson buffer consisting of 0.04 M  
49 H<sub>3</sub>BO<sub>3</sub>, 0.04 M H<sub>3</sub>PO<sub>4</sub> and 0.04 M CH<sub>3</sub>COOH to prepare various pH (pH 2–11)  
50 solutions. 200 μL of FNs solution (3.5 mg mL<sup>-1</sup>) was added to 2 mL of pH-adjusted  
51 Britton–Robinson buffer and the fluorescence intensity at excitation wavelength of  
52 320 nm was recorded for each of the samples, and triplicate measurements on each  
53 sample were averaged to yield the recorded value for the sample.

54 **Effect of Ionic strength on fluorescence intensity of the FNs.** In this work, sodium  
55 ions solutions of different concentrations (5.0, 4.5, 4.0, 3.5, 3.0, 2.5, 2.0, 1.5, 1.0, 0.5  
56 mol L<sup>-1</sup>) were prepared with sodium chloride (NaCl) to study the effect of ionic  
57 strength on the fluorescent property of the FNs. 200 μL of FNs solution (3.5 mg mL<sup>-1</sup>)  
58 was added to 1.8 mL of each of the NaCl solution samples to prepare a set of 2 mL of  
59 FN-NaCl solutions with various NaCl concentrations. A blank control is prepared  
60 with 200 μL of FNs solution added into 1.8 mL of pure water. The fluorescence  
61 intensity of each of the samples was recorded at the excitation wavelength of 320 nm,  
62 and triplicate measurements on each sample were averaged to yield the recorded value  
63 for the sample.

64 **Effects of Metal ions on fluorescence intensity of the FNs.** 200 μL FNs solution (5  
65 mg mL<sup>-1</sup>) was added to solutions of different metal ions (MnSO<sub>4</sub>·H<sub>2</sub>O, CaCl<sub>2</sub>·2H<sub>2</sub>O,  
66 CuCl<sub>2</sub>·2H<sub>2</sub>O, FeCl<sub>2</sub>·4H<sub>2</sub>O, MgCl<sub>2</sub>·6H<sub>2</sub>O, FeCl<sub>3</sub>·6H<sub>2</sub>O, NiCl<sub>2</sub>·6H<sub>2</sub>O, Co(NO<sub>3</sub>)<sub>2</sub>·6H<sub>2</sub>O

67 and  $\text{ZnSO}_4 \cdot 7\text{H}_2\text{O}$ , all at the concentration of  $1 \text{ mmol L}^{-1}$ ) to a final volume of 2 mL,  
68 respectively. The FNs solution without metal ions was used as the blank control. The  
69 fluorescence intensity of each of the samples was recorded using 320 nm wavelength  
70 as excitation, and triplicate measurements on each sample were averaged to yield the  
71 recorded value for the sample.

72 **Effect of irradiation time on fluorescence intensity of the FNs.** 2 mL of FNs  
73 aqueous solution ( $1.75 \text{ mg mL}^{-1}$ ) was irradiated at 10, 20, 30, 40, 50, 60, 70, 80 min,  
74 respectively, by an UV lamp at 365 nm. Fluorescence intensity after irradiation was  
75 recorded with 320 nm wavelength as excitation. The fluorescence intensity at 0 min  
76 irradiation was treated as an initial control. Triplicate measurements on each sample  
77 were averaged to yield the recorded value for the sample.

78

79

80

81

82

83

84

85

86

87

88

## 89 Results

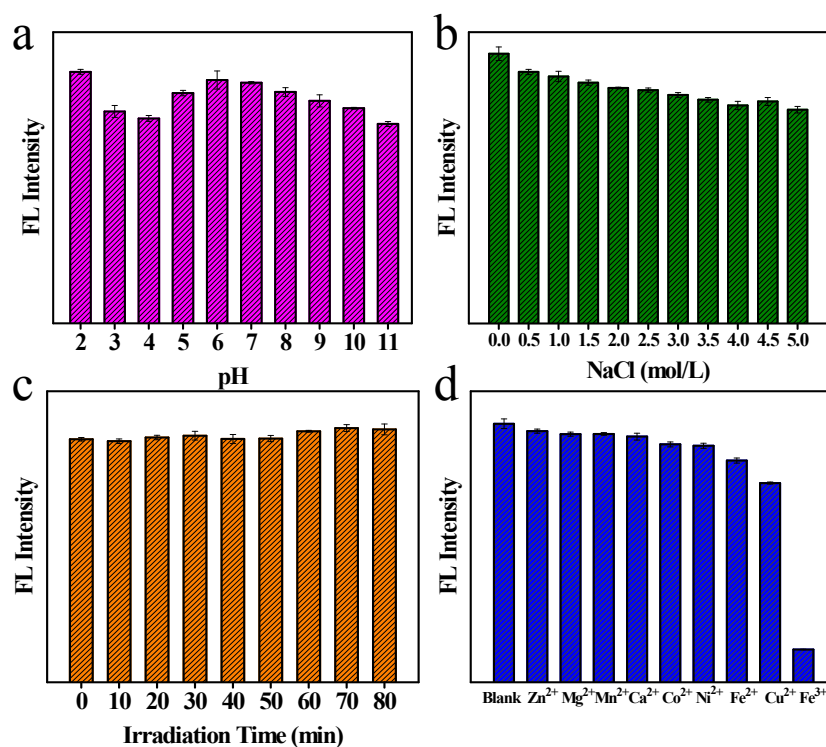

90

91 **Figure S1** (a) The fluorescence responses of FNs towards different pH. (b) The  
92 fluorescence responses of FNs towards different NaCl concentration. (c) The  
93 fluorescence responses of FNs towards different irradiation time. (d) The fluorescence  
94 responses of FNs towards different metal ions.

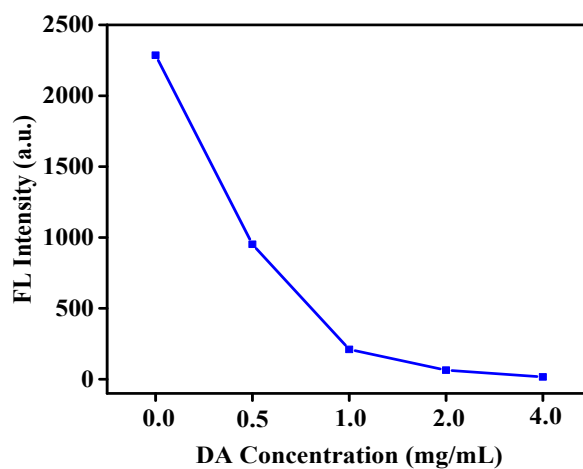

95

96 **Figure S2** Fluorescence intensity of FNs (3.75 mg mL<sup>-1</sup>) with the addition of different  
97 concentration of dopamine.  $\lambda_{\text{ex}}=330$  nm,  $\lambda_{\text{em}}=407$  nm.

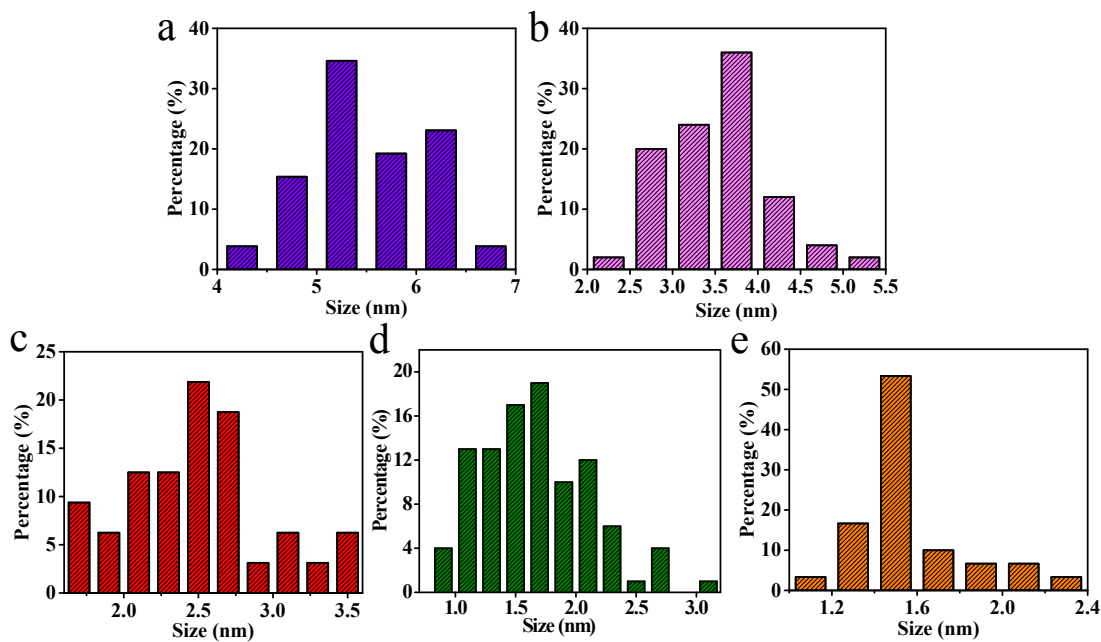

98

99 **Figure S3** Corresponding particle size histogram of (a) PDA-FCs, (b) FNs-FCs-0.5,

100 (c) FNs-FCs-1, (d) FNs-FCs-2 and (e) FNs-FCs-4, respectively.

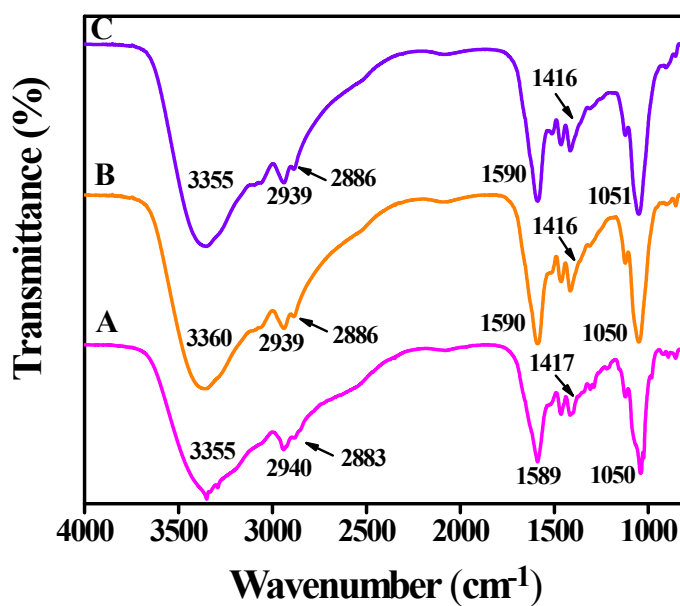

101

102 **Figure S4** FT-IR spectra of (A) FNs-FCs-0.5, (B) FNs-FCs-1 and (C) FNs-FCs-2,

103 respectively.

104

105

106

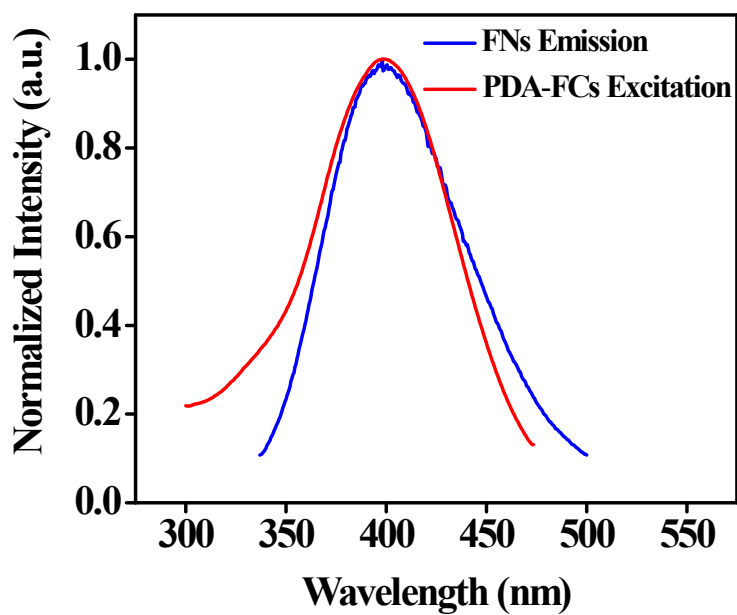

107

108 **Figure S5** Fluorescence emission spectra of FNs (Ex=320nm) and the excitation  
109 spectra of PDA-FCs (Em=400nm).

110

111

112

113

114

115

116

117

118

119

120

121 **Table S1** Quantum yield results of FNs, PDA-FCs and FNs-FCs samples.

|                      | <b>FNs</b> | <b>PDA-FCs</b> | <b>FNs-FCs-0.5</b> | <b>FNs-FCs-1</b> | <b>FNs-FCs-2</b> | <b>FNs-FCs-4</b> |
|----------------------|------------|----------------|--------------------|------------------|------------------|------------------|
| <b>R<sup>2</sup></b> | 0.994      | 0.997          | 0.995              | 0.993            | 0.999            | 0.992            |
| <b>QY</b>            | 5.71%      | 0.59%          | 1.61%              | 1.05%            | 0.94%            | 0.36%            |

122

123 **Table S2** XPS survey analysis results of FNs, PDA-FCs and FNs-FCs-4 samples.

| <b>Sample</b> | <b>C(%)</b> | <b>O(%)</b> | <b>N(%)</b> | <b>O/C(%)</b> | <b>N/C(%)</b> |
|---------------|-------------|-------------|-------------|---------------|---------------|
| FNs           | 63.99       | 33.97       | 2.03        | 53.09         | 3.17          |
| PDA-FCs       | 74.53       | 20.46       | 4.68        | 27.45         | 6.28          |
| FNs-FCs-4     | 71.80       | 24.76       | 3.16        | 34.48         | 4.40          |

124

125 **Table S3** Fluorescence lifetime fitting parameters of FNs, FNs-FCs and PDA-FCs

126 samples.

| <b>Sample</b> | <b><math>\chi^2</math></b> | <b><math>\tau_1</math>(ns)</b> | <b><math>\tau_2</math>(ns)</b> | <b>A<sub>1</sub>(%)</b> | <b>A<sub>2</sub>(%)</b> | <b><math>\tau</math>(ns)</b> |
|---------------|----------------------------|--------------------------------|--------------------------------|-------------------------|-------------------------|------------------------------|
| FNs           | 0.993                      | 1.23                           | 7.93                           | 24.34                   | 75.66                   | 6.30                         |
| FNs-FCs-0.5   | 1.259                      | 1.58                           | 9.20                           | 49.93                   | 50.07                   | 5.40                         |
| FNs-FCs-1     | 1.179                      | 1.36                           | 7.53                           | 42.43                   | 57.57                   | 4.91                         |
| FNs-FCs-2     | 1.281                      | 1.40                           | 8.25                           | 58.63                   | 41.37                   | 4.23                         |
| FNs-FCs-4     | 1.186                      | 1.34                           | 6.20                           | 67.57                   | 32.43                   | 2.92                         |
| PDA-FCs       | 1.074                      | 1.02                           | 4.65                           | 15.82                   | 84.18                   | 4.08                         |

127
